# Supplementary material for: Linkage mapping of Mungbean yellow mosaic India virus (MYMIV) resistance gene in soybean
Source: PubMed Central journal article supplement — Breed Sci. 2017 Mar 4;67(2):95–100. doi: 10.1270/jsbbs.16115 (PMC5445968; doi:10.1270/jsbbs.16115), 2017-03-04
Supplement: 67_16115_1.pdf [file 67_16115_1.pdf]

**Supplemental Table 1.** List of SSR markers used in parental polymorphism survey of the cross JS335 X PI171443

| S.No. | Marker name | Linkage group | Chromosome no. | Genetic position (in cM) | Amplicon size |          |
|-------|-------------|---------------|----------------|--------------------------|---------------|----------|
|       |             |               |                |                          | JS335         | PI171443 |
| 1     | Satt572     | A1            | 5              | 14.56                    | 160           | 170      |
| 2     | Satt593     | A1            | 5              | 25.66                    | 190           | 195      |
| 3     | Sat_385     | A1            | 5              | 31.07                    | 300           | 250      |
| 4     | Sat_407     | A1            | 5              | 52.32                    | 200           | 205      |
| 5     | Satt385     | A1            | 5              | 64.75                    | 300           | 250      |
| 6     | Satt200     | A1            | 5              | 92.88                    | 210           | 130      |
| 7     | Satt258     | A1            | 5              | 95.94                    | 240           | 245      |
| 8     | Sat_217     | A1            | 5              | 101.57                   | 260           | 240      |
| 9     | Satt480     | A2            | 8              | 22.80                    | 170           | 230      |
| 10    | Sat_181     | A2            | 8              | 32.49                    | 210           | 180      |
| 11    | Satt424     | A2            | 8              | 53.55                    | 220           | 300      |
| 12    | AW132402    | A2            | 8              | 61.443                   | 160           | 240      |
| 13    | Sat_199     | A2            | 8              | 70.95                    | 270           | 150      |
| 14    | Satt525     | A2            | 8              | 83.60                    | 300           | 280      |
| 15    | Sat_040     | A2            | 8              | 103.56                   | 300           | 280      |
| 16    | Satt538     | A2            | 8              | 137.25                   | 110           | 120      |
| 17    | BE806308    | B1            | 11             | 0.00                     | 200           | 210      |
| 18    | Satt411     | B1            | 11             | 13.66                    | 100           | 110      |
| 19    | Sat_270     | B1            | 11             | 25.63                    | 240           | 250      |
| 20    | Satt509     | B1            | 11             | 37.47                    | 190           | 195      |
| 21    | Satt197     | B1            | 11             | 49.06                    | 190           | 180      |
| 22    | Satt430     | B1            | 11             | 81.42                    | 230           | 210      |
| 23    | BE801538    | B1            | 11             | 126.51                   | 220           | 215      |
| 24    | Satt577     | B2            | 14             | 5.47                     | 250           | 240      |
| 25    | Sat_287     | B2            | 14             | 31.88                    | 140           | 130      |
| 26    | Satt424     | B2            | 14             | 53.55                    | 190           | 198      |
| 27    | Sat_189     | B2            | 14             | 63.46                    | 195           | 180      |
| 28    | Sat_009     | B2            | 14             | 78.86                    | 185           | 180      |
| 29    | Satt063     | B2            | 14             | 80.78                    | 140           | 100      |
| 30    | Satt726     | B2            | 14             | 91.05                    | 190           | 210      |
| 31    | Satt687     | B2            | 14             | 100.27                   | 160           | 150      |
| 32    | Satt565     | C1            | 4              | 0.00                     | 180           | 187      |
| 33    | Sat_367     | C1            | 4              | 28.04                    | 240           | 230      |
| 34    | Sat_140     | C1            | 4              | 41.43                    | 240           | 250      |
| 35    | Satt578     | C1            | 4              | 65.08                    | 150           | 130      |
| 36    | Satt190     | C1            | 4              | 73.32                    | 195           | 210      |
| 37    | Satt338     | C1            | 4              | 123.79                   | 220           | 310      |
| 38    | Satt681     | C2            | 6              | 4.98                     | 240           | 248      |
| 39    | Satt640     | C2            | 6              | 29.62                    | 190           | 210      |

|    |          |     |    |        |     |     |
|----|----------|-----|----|--------|-----|-----|
| 40 | Sat_281  | C2  | 6  | 38.89  | 240 | 200 |
| 41 | Satt457  | C2  | 6  | 52.51  | 260 | 270 |
| 42 | GMAC7 L  | C2  | 6  | 69.68  | 125 | 100 |
| 43 | Satt305  | C2  | 6  | 64.91  | 240 | 200 |
| 44 | Satt322  | C2  | 6  | 73.18  | 220 | 200 |
| 45 | Satt450  | C2  | 6  | 80.01  | 240 | 320 |
| 46 | Sat_213  | C2  | 6  | 84.66  | 200 | 240 |
| 47 | Sat_246  | C2  | 6  | 84.88  | 250 | 200 |
| 48 | Satt643  | C2  | 6  | 92.66  | 250 | 260 |
| 49 | Satt658  | C2  | 6  | 103.37 | 240 | 235 |
| 50 | Satt202  | C2  | 6  | 114.18 | 300 | 260 |
| 51 | Satt184  | D1a | 1  | 17.52  | 150 | 200 |
| 52 | Satt532  | D1a | 1  | 49.07  | 170 | 190 |
| 53 | Satt548  | D1a | 1  | 51.07  | 250 | 245 |
| 54 | AW781285 | D1a | 1  | 67.78  | 180 | 170 |
| 55 | Satt468  | D1a | 1  | 69.91  | 210 | 220 |
| 56 | Satt129  | D1a | 1  | 109.67 | 140 | 155 |
| 57 | Sat_351  | D1b | 2  | 20.61  | 215 | 200 |
| 58 | Satt558  | D1b | 2  | 43.91  | 240 | 230 |
| 59 | AI856415 | D1b | 2  | 50.11  | 205 | 200 |
| 60 | Satt266  | D1b | 2  | 59.61  | 190 | 182 |
| 61 | Satt141  | D1b | 2  | 72.89  | 150 | 200 |
| 62 | Satt600  | D1b | 2  | 75.41  | 210 | 200 |
| 63 | Satt041  | D1b | 2  | 84.04  | 240 | 260 |
| 64 | Satt459  | D1b | 2  | 118.62 | 180 | 190 |
| 65 | Sat_289  | D1b | 2  | 131.92 | 150 | 250 |
| 66 | Sat_333  | D2  | 17 | 7.46   | 170 | 180 |
| 67 | Satt458  | D2  | 17 | 24.40  | 160 | 150 |
| 68 | Sat_002  | D2  | 17 | 42.69  | 140 | 130 |
| 69 | Satt208  | D2  | 17 | 57.09  | 180 | 190 |
| 70 | Satt292  | D2  | 17 | 62.87  | 230 | 250 |
| 71 | Satt301  | D2  | 17 | 79.22  | 190 | 260 |
| 72 | GMHSP179 | D2  | 17 | 84.17  | 100 | 105 |
| 73 | Satt186  | D2  | 17 | 98.22  | 250 | 210 |
| 74 | Satt256  | D2  | 17 | 110.05 | 250 | 230 |
| 75 | Sat_220  | D2  | 17 | 114.29 | 245 | 240 |
| 76 | Satt386  | D2  | 17 | 125.00 | 185 | 160 |
| 77 | Satt575  | E   | 15 | 3.66   | 220 | 210 |
| 78 | Satt384  | E   | 15 | 19.61  | 135 | 150 |
| 79 | Sat_124  | E   | 15 | 50.77  | 260 | 250 |
| 80 | Satt598  | E   | 15 | 69.70  | 170 | 190 |
| 81 | Sat_240  | F   | 13 | 8.68   | 140 | 190 |
| 82 | Satt145  | F   | 13 | 27.60  | 140 | 150 |
| 83 | Satt586  | F   | 13 | 33.7   | 200 | 210 |
| 84 | Satt146  | F   | 13 | 37.14  | 220 | 240 |
| 85 | Satt114  | F   | 13 | 43.89  | 105 | 80  |

|     |          |   |    |        |     |     |
|-----|----------|---|----|--------|-----|-----|
| 86  | Sat_197  | F | 13 | 77.72  | 170 | 250 |
| 87  | Satt395  | F | 13 | 108.87 | 260 | 270 |
| 88  | Satt163  | G | 18 | 0.00   | 240 | 245 |
| 89  | Sat_168  | G | 18 | 9.93   | 180 | 195 |
| 90  | Satt309  | G | 18 | 10.10  | 150 | 130 |
| 91  | Satt141  | G | 18 | 13.97  | 140 | 200 |
| 92  | Satt235  | G | 18 | 24.96  | 130 | 120 |
| 93  | Satt115  | G | 18 | 44.14  | 170 | 140 |
| 94  | Satt352  | G | 18 | 50.53  | 185 | 180 |
| 95  | Satt199  | G | 18 | 60.59  | 190 | 230 |
| 96  | Satt288  | G | 18 | 71.58  | 210 | 240 |
| 97  | Sat_064  | G | 18 | 101.82 | 250 | 280 |
| 98  | Satt666  | H | 12 | 0.59   | 240 | 250 |
| 99  | Satt568  | H | 12 | 27.51  | 210 | 250 |
| 100 | Satt541  | H | 12 | 53.35  | 160 | 170 |
| 101 | Satt279  | H | 12 | 68.50  | 170 | 190 |
| 102 | Satt314  | H | 12 | 69.12  | 250 | 240 |
| 103 | Satt181  | H | 12 | 91.12  | 180 | 210 |
| 104 | Satt571  | I | 20 | 18.50  | 140 | 150 |
| 105 | Satt239  | I | 20 | 29.61  | 250 | 270 |
| 106 | Satt587  | I | 20 | 31.49  | 160 | 170 |
| 107 | Satt614  | I | 20 | 31.94  | 270 | 300 |
| 108 | Sat_174  | I | 20 | 36.59  | 200 | 220 |
| 109 | Sat_650  | I | 20 | 55.52  | 240 | 200 |
| 110 | Sat_420  | I | 20 | 89.75  | 190 | 175 |
| 111 | AW310961 | J | 16 | 5.19   | 190 | 180 |
| 112 | Satt674  | J | 16 | 15.95  | 200 | 205 |
| 113 | Satt285  | J | 16 | 25.51  | 200 | 190 |
| 114 | Sat_686  | J | 16 | 40.50  | 200 | 185 |
| 115 | Sat_396  | J | 16 | 75.80  | 130 | 150 |
| 116 | Satt431  | J | 16 | 82.02  | 210 | 240 |
| 117 | Sat_144  | J | 16 | 90.13  | 130 | 200 |
| 118 | Satt539  | K | 9  | 2.96   | 150 | 190 |
| 119 | Sat_055  | K | 9  | 32.96  | 80  | 120 |
| 120 | Satt552  | K | 9  | 46.44  | 135 | 150 |
| 121 | Satt240  | K | 9  | 52.88  | 235 | 240 |
| 122 | Satt260  | K | 9  | 80.12  | 230 | 245 |
| 123 | Sat_126  | K | 9  | 91.19  | 380 | 350 |
| 125 | Satt523  | L | 19 | 25.56  | 200 | 190 |
| 126 | Satt143  | L | 19 | 30.19  | 260 | 275 |
| 127 | Satt229  | L | 19 | 93.89  | 200 | 250 |
| 128 | Satt150  | M | 7  | 16.86  | 240 | 190 |
| 129 | Satt245  | M | 7  | 49.04  | 210 | 240 |
| 130 | Satt551  | M | 7  | 89.44  | 240 | 230 |
| 131 | Sat_330  | M | 7  | 132.42 | 250 | 260 |
| 132 | Satt009  | N | 3  | 28.52  | 175 | 160 |

|     |         |   |    |        |     |     |
|-----|---------|---|----|--------|-----|-----|
| 133 | Satt186 | N | 3  | 30.11  | 310 | 320 |
| 134 | Satt312 | N | 3  | 79.86  | 240 | 245 |
| 136 | Satt257 | N | 3  | 92.56  | 250 | 255 |
| 137 | Sat_295 | N | 3  | 95.00  | 250 | 300 |
| 138 | Satt132 | O | 10 | 8.75   | 255 | 250 |
| 139 | Satt318 | O | 10 | 20.47  | 200 | 150 |
| 140 | Satt345 | O | 10 | 52.096 | 250 | 240 |
| 141 | Satt477 | O | 10 | 77.31  | 160 | 140 |
| 143 | Satt592 | O | 10 | 91.35  | 230 | 200 |
| 144 | Sat_108 | O | 10 | 117.38 | 250 | 200 |

---

**Supplemental Table 2.** List of SSR markers used in parental polymorphism survey of the cross SL525 X NRC101

| S.No. | Marker name | Linkage group | Chromosome no. | Genetic position (in cM) | Amplicon size |        |
|-------|-------------|---------------|----------------|--------------------------|---------------|--------|
|       |             |               |                |                          | SL525         | NRC101 |
| 1     | Satt572     | A1            | 5              | 14.56                    | 170           | 160    |
| 2     | Satt593     | A1            | 5              | 25.66                    | 195           | 190    |
| 3     | Sat_050     | A1            | 5              | 46.45                    | 205           | 230    |
| 4     | Sat_407     | A1            | 5              | 52.32                    | 205           | 200    |
| 5     | Satt200     | A1            | 5              | 92.88                    | 210           | 250    |
| 6     | Satt258     | A1            | 5              | 95.94                    | 250           | 240    |
| 7     | Sat_217     | A1            | 5              | 101.57                   | 240           | 260    |
| 8     | Sat_181     | A2            | 8              | 32.49                    | 180           | 210    |
| 9     | Satt187     | A2            | 8              | 49.86                    | 200           | 240    |
| 10    | AW132402    | A2            | 8              | 61.443                   | 160           | 240    |
| 11    | Satt525     | A2            | 8              | 83.60                    | 280           | 300    |
| 12    | Sat_040     | A2            | 8              | 103.56                   | 280           | 300    |
| 13    | Satt228     | A2            | 8              | 133.76                   | 110           | 120    |
| 14    | Satt538     | A2            | 8              | 137.25                   | 110           | 120    |
| 15    | Satt409     | A2            | 8              | 145.57                   | 240           | 210    |
| 16    | BE806308    | B1            | 11             | 0.00                     | 210           | 200    |
| 17    | Sat_270     | B1            | 11             | 25.63                    | 200           | 210    |
| 18    | Satt509     | B1            | 11             | 37.47                    | 200           | 280    |
| 19    | Satt197     | B1            | 11             | 49.06                    | 190           | 180    |
| 20    | Satt430     | B1            | 11             | 81.42                    | 210           | 230    |
| 21    | BE801538    | B1            | 11             | 126.51                   | 215           | 220    |
| 22    | Satt577     | B2            | 14             | 5.47                     | 250           | 220    |
| 23    | Sat_342     | B2            | 14             | 15.5                     | 240           | 175    |
| 24    | Sat_287     | B2            | 14             | 26.64                    | 200           | 260    |
| 25    | Satt424     | B2            | 14             | 53.55                    | 190           | 170    |
| 26    | Sat_189     | B2            | 14             | 63.46                    | 160           | 180    |
| 27    | Satt063     | B2            | 14             | 80.78                    | 100           | 140    |
| 28    | Satt687     | B2            | 14             | 100.27                   | 150           | 160    |
| 29    | Satt565     | C1            | 4              | 0.00                     | 187           | 180    |
| 30    | Sat_367     | C1            | 4              | 28.04                    | 230           | 240    |
| 31    | Sat_140     | C1            | 4              | 41.43                    | 240           | 250    |
| 32    | Satt578     | C1            | 4              | 65.08                    | 130           | 150    |
| 33    | Satt190     | C1            | 4              | 73.32                    | 210           | 195    |
| 34    | Satt399     | C1            | 4              | 76.23                    | 300           | 280    |
| 35    | Satt338     | C1            | 4              | 123.79                   | 310           | 220    |
| 36    | Satt681     | C2            | 6              | 4.98                     | 248           | 240    |
| 37    | Sat_281     | C2            | 6              | 38.89                    | 250           | 190    |
| 38    | Satt457     | C2            | 6              | 52.51                    | 260           | 265    |
| 39    | Sat_153     | C2            | 6              | 57.29                    | 210           | 200    |
| 40    | Satt170     | C2            | 6              | 64.88                    | 125           | 195    |
| 41    | Satt305     | C2            | 6              | 64.91                    | 220           | 200    |

|    |          |     |    |        |     |     |
|----|----------|-----|----|--------|-----|-----|
| 42 | GMAC7 L  | C2  | 6  | 69.68  | 100 | 125 |
| 43 | Satt322  | C2  | 6  | 73.18  | 200 | 220 |
| 44 | Satt450  | C2  | 6  | 80.01  | 240 | 320 |
| 45 | Sat_213  | C2  | 6  | 84.66  | 200 | 190 |
| 46 | Sat_246  | C2  | 6  | 84.88  | 190 | 240 |
| 47 | Satt643  | C2  | 6  | 92.66  | 260 | 250 |
| 48 | Satt376  | C2  | 6  | 90.84  | 220 | 250 |
| 49 | Satt363  | C2  | 6  | 98.07  | 260 | 250 |
| 50 | Satt658  | C2  | 6  | 103.37 | 240 | 235 |
| 51 | Sat_332  | D1a | 1  | 5.25   | 270 | 250 |
| 52 | Satt184  | D1a | 1  | 17.52  | 200 | 150 |
| 53 | Satt502  | D1a | 1  | 49.84  | 255 | 230 |
| 54 | Satt532  | D1a | 1  | 49.07  | 190 | 140 |
| 55 | Satt548  | D1a | 1  | 51.07  | 245 | 220 |
| 56 | Satt267  | D1a | 1  | 57.34  | 240 | 200 |
| 57 | AW781285 | D1a | 1  | 67.78  | 170 | 180 |
| 58 | Satt468  | D1a | 1  | 69.91  | 220 | 210 |
| 59 | Satt129  | D1a | 1  | 109.67 | 155 | 140 |
| 60 | Sat_351  | D1b | 2  | 20.61  | 200 | 215 |
| 61 | Satt558  | D1b | 2  | 43.91  | 240 | 240 |
| 62 | AI856415 | D1b | 2  | 50.11  | 200 | 205 |
| 63 | Satt266  | D1b | 2  | 59.61  | 190 | 170 |
| 64 | Satt141  | D1b | 2  | 72.89  | 200 | 150 |
| 65 | Satt600  | D1b | 2  | 75.41  | 200 | 210 |
| 66 | Satt189  | D1b | 2  | 76.32  | 120 | 150 |
| 67 | Satt041  | D1b | 2  | 84.04  | 260 | 240 |
| 68 | Satt459  | D1b | 2  | 118.62 | 180 | 200 |
| 69 | Sat_289  | D1b | 2  | 131.92 | 250 | 150 |
| 70 | Sat_333  | D2  | 17 | 7.46   | 180 | 170 |
| 71 | Satt458  | D2  | 17 | 24.40  | 150 | 160 |
| 72 | Sat_002  | D2  | 17 | 42.69  | 140 | 160 |
| 73 | Satt208  | D2  | 17 | 57.09  | 190 | 180 |
| 74 | Satt292  | D2  | 17 | 62.87  | 200 | 250 |
| 75 | Satt301  | D2  | 17 | 79.22  | 230 | 190 |
| 76 | GMHSP179 | D2  | 17 | 84.17  | 105 | 100 |
| 77 | Satt256  | D2  | 17 | 110.05 | 200 | 230 |
| 78 | Sat_220  | D2  | 17 | 114.29 | 240 | 245 |
| 79 | Satt386  | D2  | 17 | 125.00 | 160 | 185 |
| 80 | Satt575  | E   | 15 | 3.66   | 220 | 210 |
| 81 | Satt384  | E   | 15 | 19.61  | 150 | 135 |
| 82 | Sat_124  | E   | 15 | 50.77  | 230 | 250 |
| 83 | Satt598  | E   | 15 | 69.70  | 170 | 190 |
| 84 | Sat_240  | F   | 13 | 8.68   | 190 | 140 |
| 85 | Satt145  | F   | 13 | 27.60  | 150 | 140 |
| 86 | Satt586  | F   | 13 | 33.7   | 200 | 205 |
| 87 | Satt146  | F   | 13 | 37.14  | 380 | 300 |

---

|     |          |   |    |        |     |     |
|-----|----------|---|----|--------|-----|-----|
| 88  | Satt114  | F | 13 | 43.89  | 145 | 80  |
| 89  | Sat_197  | F | 13 | 77.72  | 250 | 170 |
| 90  | Satt395  | F | 13 | 108.87 | 270 | 260 |
| 91  | Satt163  | G | 18 | 0.00   | 245 | 240 |
| 92  | Sat_168  | G | 18 | 9.93   | 195 | 180 |
| 93  | Satt235  | G | 18 | 24.96  | 120 | 130 |
| 94  | Satt115  | G | 18 | 44.14  | 140 | 170 |
| 95  | Satt352  | G | 18 | 50.53  | 160 | 180 |
| 96  | Satt199  | G | 18 | 60.59  | 190 | 220 |
| 97  | Satt288  | G | 18 | 71.58  | 240 | 210 |
| 98  | Sat_064  | G | 18 | 101.82 | 280 | 250 |
| 99  | Satt666  | H | 12 | 0.59   | 250 | 240 |
| 100 | Satt568  | H | 12 | 27.51  | 250 | 210 |
| 101 | Satt541  | H | 12 | 53.35  | 180 | 170 |
| 102 | Satt314  | H | 12 | 69.12  | 250 | 240 |
| 103 | Satt181  | H | 12 | 91.12  | 210 | 180 |
| 104 | Satt571  | I | 20 | 18.50  | 140 | 150 |
| 105 | Satt587  | I | 20 | 31.49  | 170 | 210 |
| 106 | Satt614  | I | 20 | 31.94  | 300 | 270 |
| 107 | Sat_174  | I | 20 | 36.59  | 220 | 200 |
| 108 | Sat_650  | I | 20 | 55.52  | 200 | 240 |
| 109 | Sat_420  | I | 20 | 89.75  | 175 | 190 |
| 110 | AW310961 | J | 16 | 5.19   | 190 | 180 |
| 111 | Satt285  | J | 16 | 25.51  | 220 | 200 |
| 112 | Sat_686  | J | 16 | 40.50  | 185 | 200 |
| 113 | Sat_396  | J | 16 | 75.80  | 150 | 130 |
| 114 | Satt431  | J | 16 | 82.02  | 240 | 210 |
| 115 | Sat_144  | J | 16 | 90.13  | 200 | 130 |
| 116 | Satt539  | K | 9  | 2.96   | 190 | 150 |
| 117 | Sat_055  | K | 9  | 32.96  | 120 | 80  |
| 118 | Sat_349  | K | 9  | 44.58  | 300 | 260 |
| 119 | Satt552  | K | 9  | 46.44  | 155 | 150 |
| 120 | Satt240  | K | 9  | 52.88  | 235 | 240 |
| 121 | Satt260  | K | 9  | 80.12  | 250 | 230 |
| 122 | Sat_126  | K | 9  | 91.19  | 350 | 380 |
| 123 | Satt523  | L | 19 | 25.56  | 240 | 190 |
| 125 | Satt143  | L | 19 | 30.19  | 260 | 260 |
| 126 | Satt229  | L | 19 | 93.89  | 230 | 250 |
| 127 | Satt150  | M | 7  | 16.86  | 190 | 240 |
| 128 | Satt245  | M | 7  | 49.04  | 240 | 210 |
| 129 | Satt551  | M | 7  | 89.44  | 240 | 230 |
| 130 | Sat_330  | M | 7  | 132.42 | 260 | 250 |
| 131 | Satt159  | N | 3  | 27.13  | 280 | 250 |
| 132 | Satt009  | N | 3  | 28.52  | 170 | 160 |
| 133 | Satt186  | N | 3  | 30.11  | 300 | 320 |
| 134 | Satt312  | N | 3  | 79.86  | 245 | 230 |

---

---

|     |         |   |    |        |     |     |
|-----|---------|---|----|--------|-----|-----|
| 136 | Satt257 | N | 3  | 92.56  | 255 | 250 |
| 137 | Sat_295 | N | 3  | 95.00  | 300 | 250 |
| 138 | Satt132 | O | 10 | 8.75   | 250 | 253 |
| 139 | Satt318 | O | 10 | 20.47  | 150 | 200 |
| 140 | Satt345 | O | 10 | 52.096 | 240 | 250 |
| 141 | Satt477 | O | 10 | 77.31  | 140 | 160 |
| 143 | Sat592  | O | 10 | 91.35  | 200 | 230 |
| 144 | Sat_108 | O | 10 | 117.38 | 200 | 250 |

---
